# Supplementary material
Source: PubMed Central journal article supplement (PMC8626825)

# Figure S1

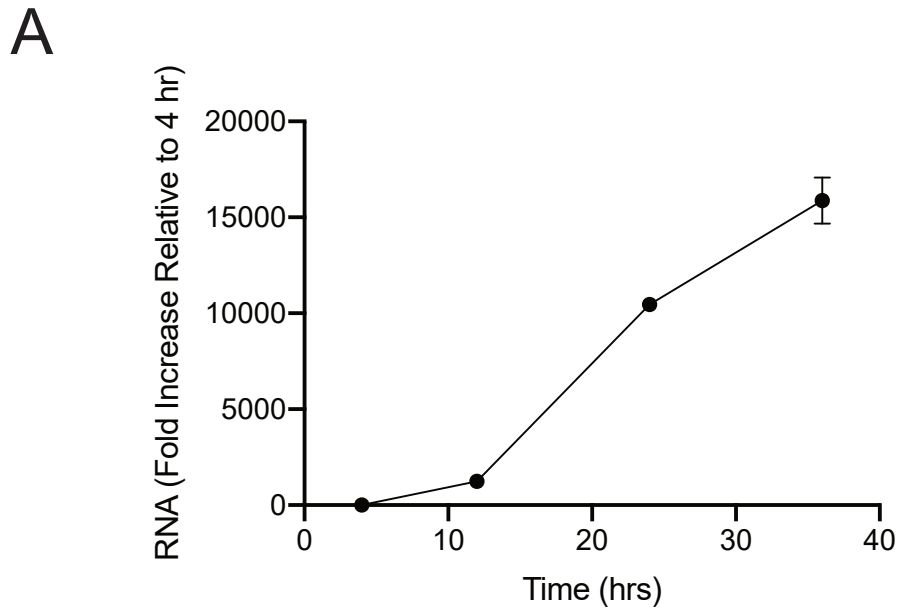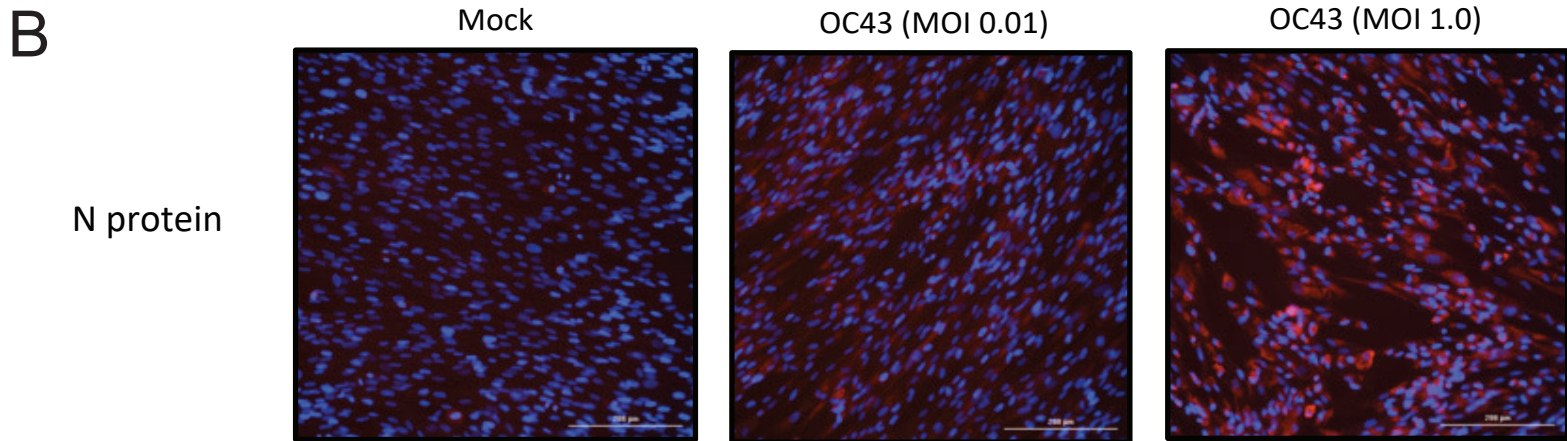

# Figure S2

## A

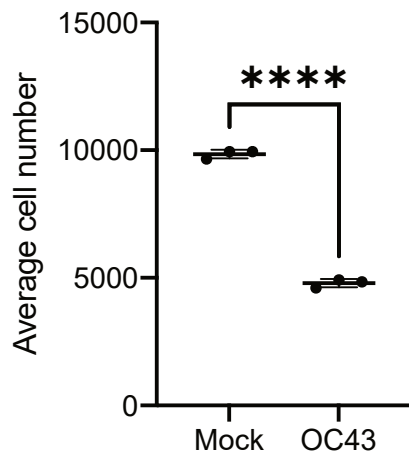

## B

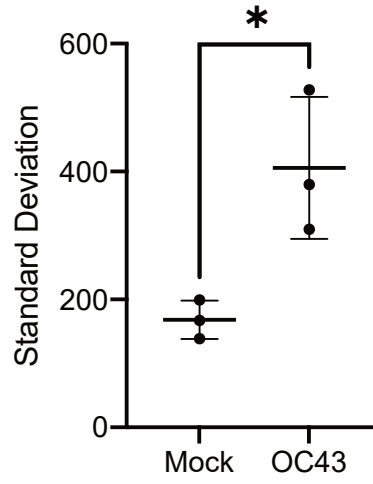

## C

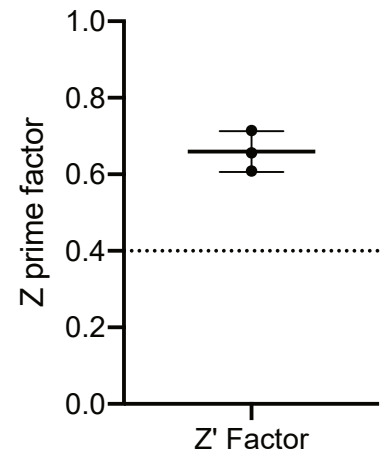

# Figure S3

## A

Percent Inhibition of Viral Killing

Bliss Score (Mean = -1.05)

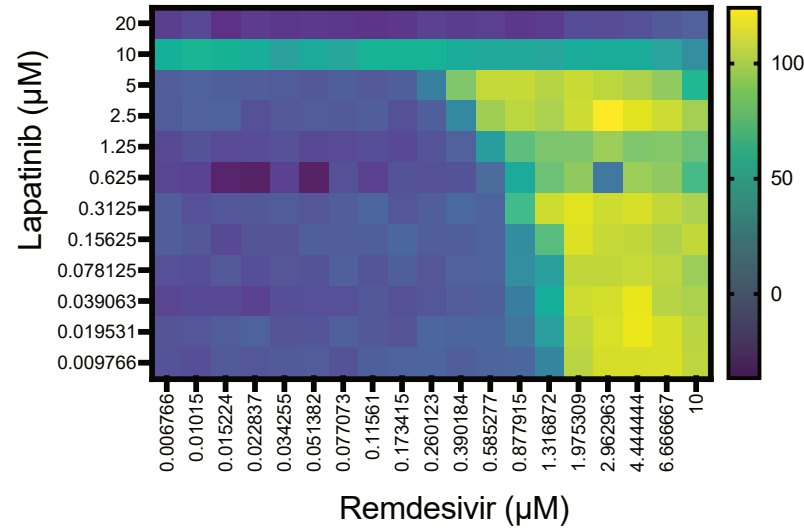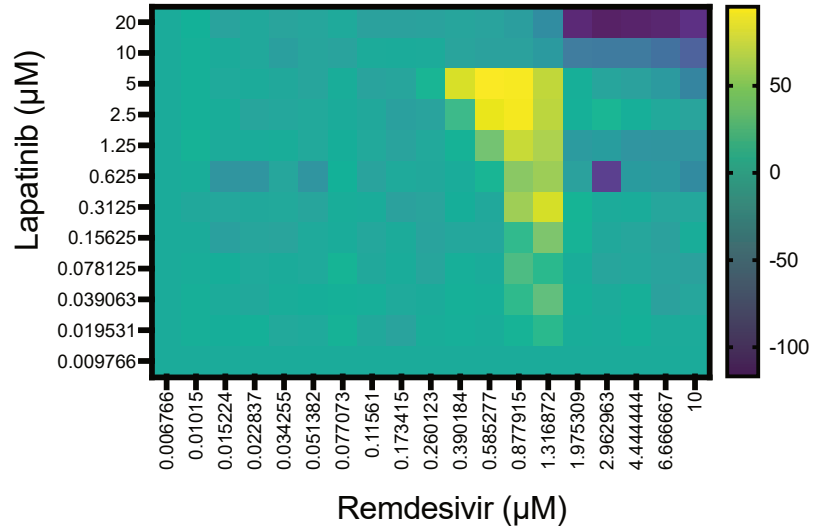

## B

Percent Inhibition of Viral Killing

Bliss Score (Mean = 2.86)

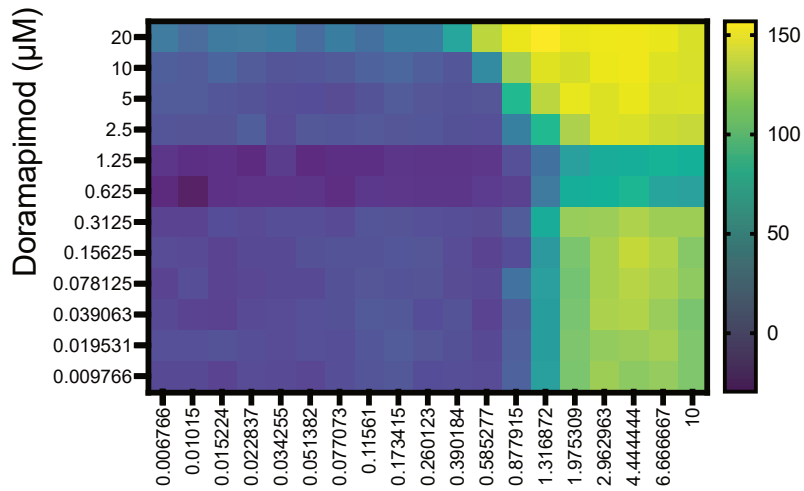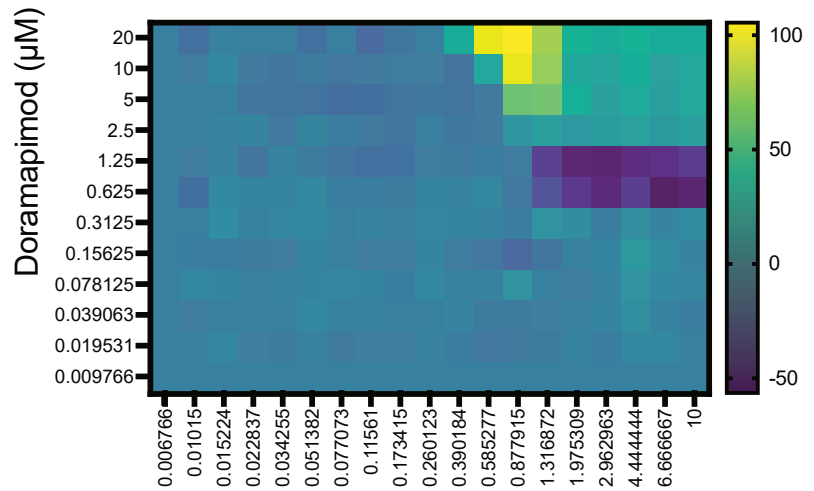

# Figure S4

● 48 hrs

○ 96 hrs

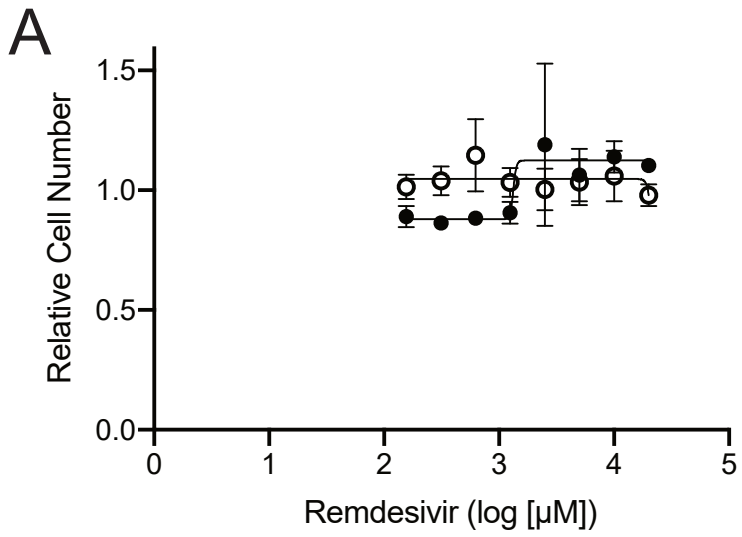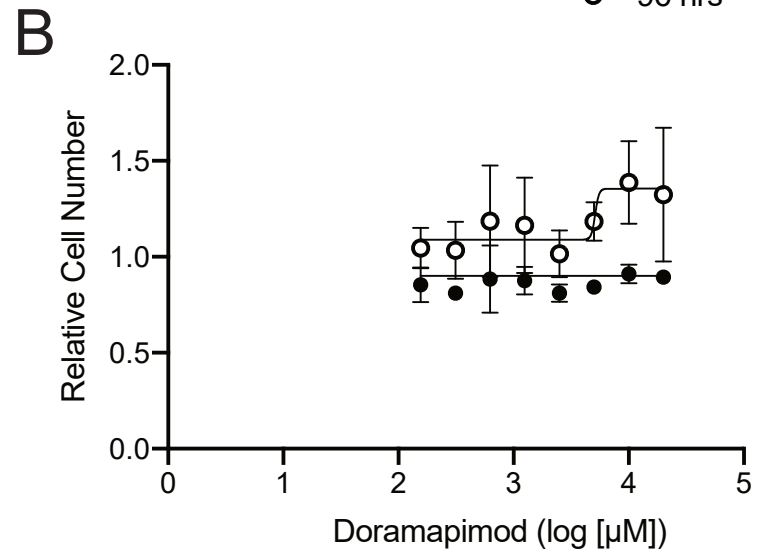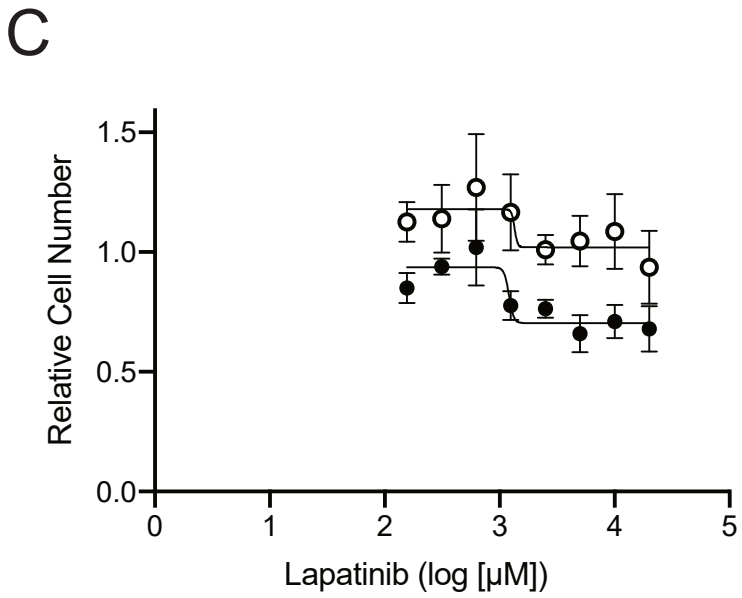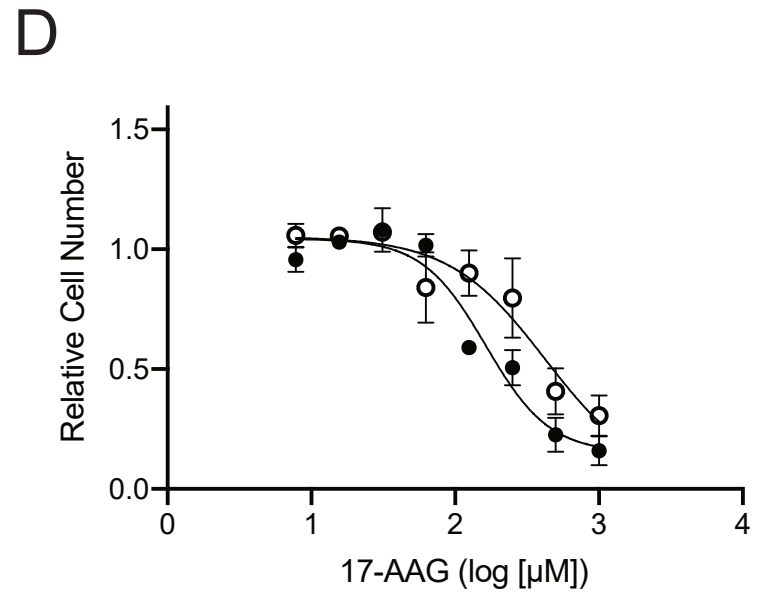

# Figure S5

- DMSO (0.1%)
- 1  $\mu\text{M}$  Lapatanib
- 5  $\mu\text{M}$  Doramapimod

## A

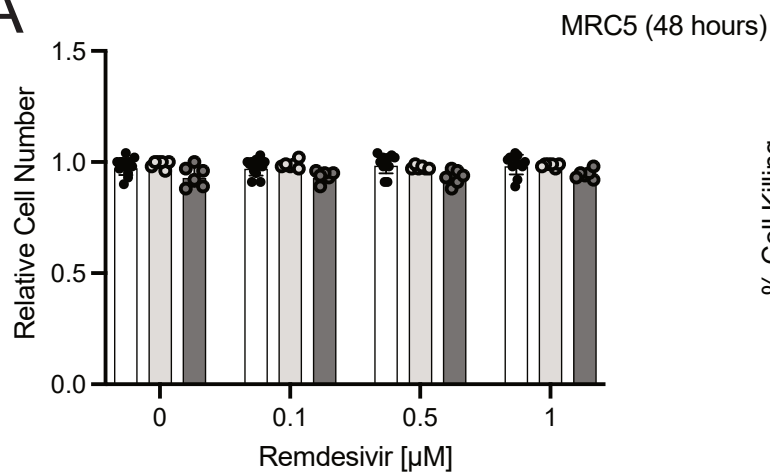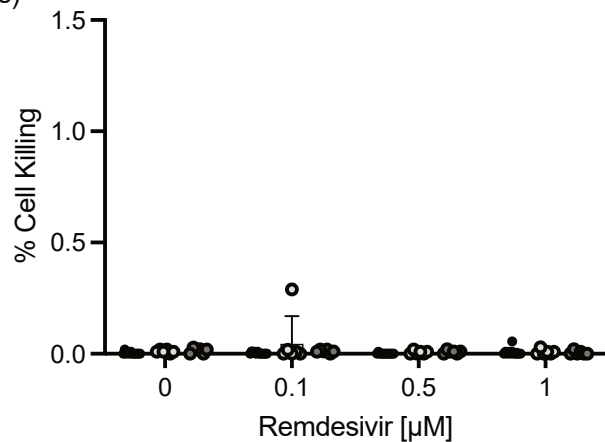

## B

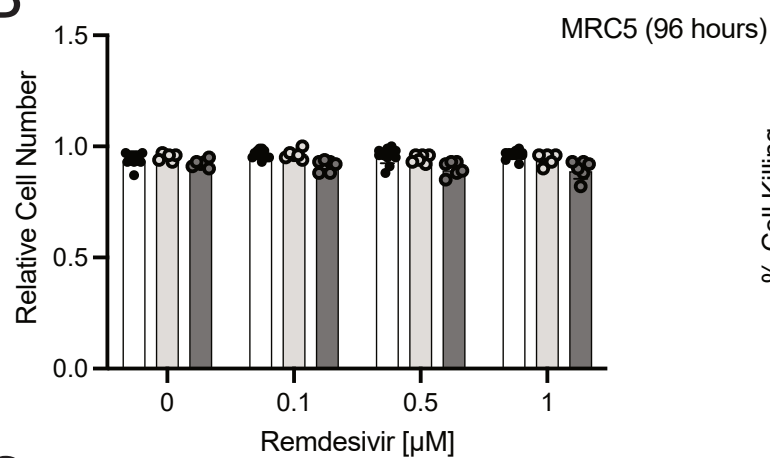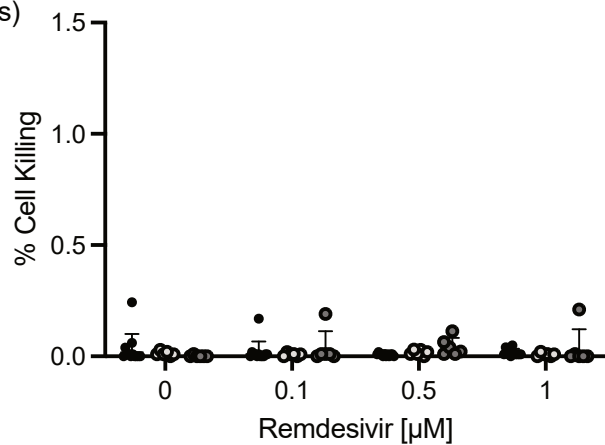

## C

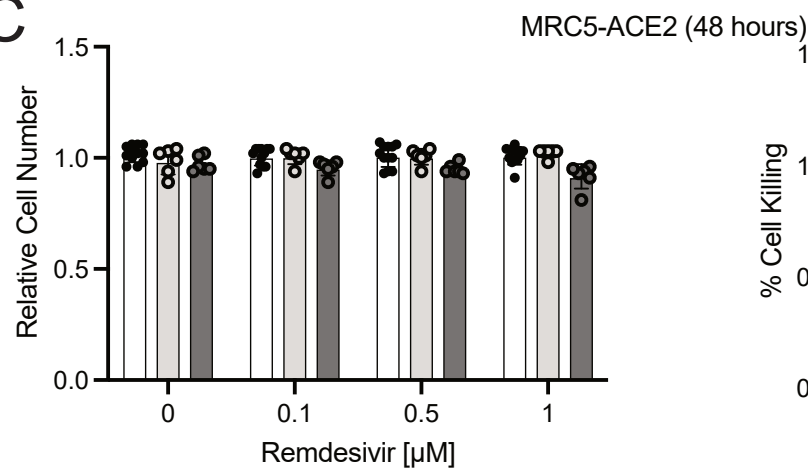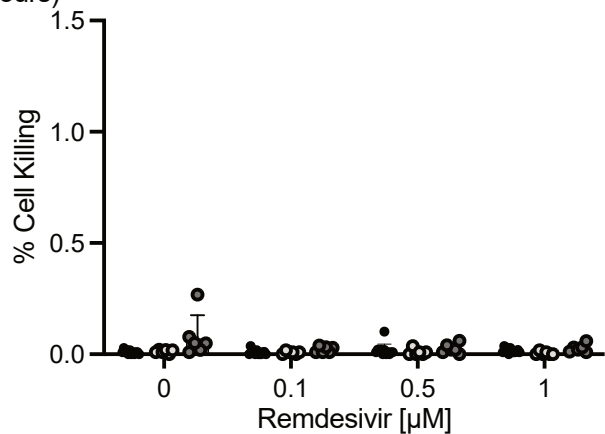

## D

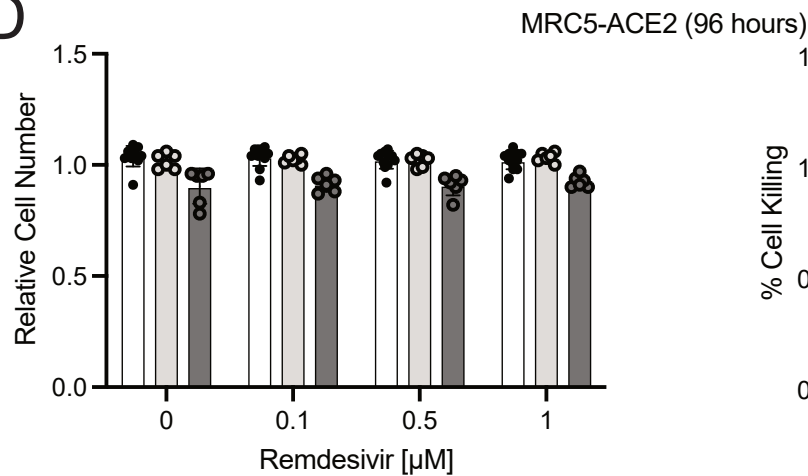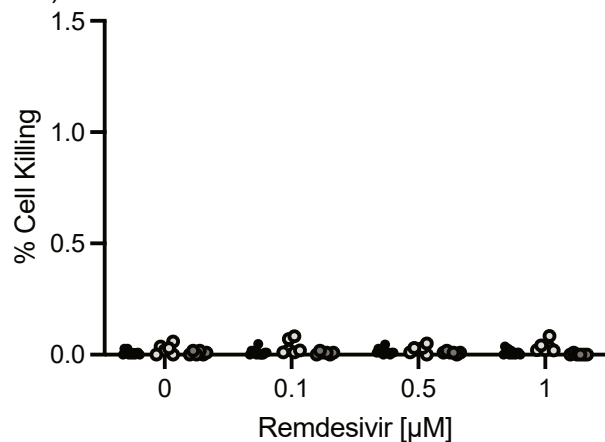

Supplement: mmc3.pdf [file mmc3.pdf]
